# Supplementary material
Source: Research Square preprint supplement (doi:10.21203/rs.3.rs-9351966/v1)
Supplement: Supplementary file 1 [file 7506e71d047557761bbcc8bc.docx]

**Table 1: Literature Search Strategy**

***PubMed Search Strategy***

(("Organoids"[Mesh] OR organoid* OR "stem cell-derived" OR "iPSC-derived"

OR "3D culture" OR "air-liquid interface")

AND

("Virus Diseases"[Mesh] OR "Viruses"[Mesh] OR virus* OR viral OR infection*

OR "emerging virus" OR "zoonotic virus")

AND

("SARS-CoV-2" OR "COVID-19" OR "MERS-CoV" OR "SARS coronavirus"

OR "Mpox" OR "Monkeypox"

OR "Zika virus"

OR "Dengue virus"

OR "Japanese encephalitis virus"

OR "Influenza A" OR influenza OR H1N1 OR H5N1 OR H7N9

OR "Enterovirus A71"

OR "Coxsackievirus" OR "Coxsackievirus A16"

OR "Ebola virus"

OR "Marburg virus"

OR "Hepatitis C virus"

OR "Chikungunya virus"

OR "Crimean-Congo hemorrhagic fever"

OR "Lassa fever"

OR "Nipah virus"

OR "Rift Valley fever"

OR Hantavirus))

***Scopus Search strategy***

(TITLE-ABS-KEY(organoid* OR "stem cell derived" OR "iPSC derived"

OR "3D culture" OR "air-liquid interface")

AND

TITLE-ABS-KEY(virus* OR viral OR infection* OR "emerging virus"

OR "zoonotic virus")

AND

TITLE-ABS-KEY("SARS-CoV-2" OR "COVID-19" OR "MERS-CoV"

OR "SARS coronavirus"

OR "Monkeypox" OR "Mpox"

OR "Zika virus"

OR "Dengue virus"

OR "Japanese encephalitis virus"

OR "Influenza A" OR influenza OR H1N1 OR H5N1 OR H7N9

OR "Enterovirus A71"

OR "Coxsackievirus" OR "Coxsackievirus A16"

OR "Ebola virus"

OR "Marburg virus"

OR "Hepatitis C virus"

OR "Chikungunya virus"

OR "Crimean Congo hemorrhagic fever"

OR "Lassa fever"

OR "Nipah virus"

OR "Rift Valley fever"

OR Hantavirus))

AND PUBYEAR > 2009 AND PUBYEAR < 2027

Table 2. Quality appraisal and risk of bias assessment of included studies using a modified Joanna Briggs Institute (JBI) critical appraisal tool.

***Web of Science Core Collection Search Strategy***

TS=(organoid* OR "stem cell-derived" OR "iPSC-derived"

OR "3D culture" OR "air-liquid interface")

AND

TS=(virus* OR viral OR infection*

OR "emerging virus" OR "zoonotic virus")

AND

TS=("SARS-CoV-2" OR "COVID-19" OR "MERS-CoV"

OR "SARS coronavirus"

OR "Mpox" OR "Monkeypox"

OR "Zika virus"

OR "Dengue virus"

OR "Japanese encephalitis virus"

OR "Influenza A" OR influenza OR H1N1 OR H5N1 OR H7N9

OR "Enterovirus A71"

OR "Coxsackievirus" OR "Coxsackievirus A16"

OR "Ebola virus"

OR "Marburg virus"

OR "Hepatitis C virus"

OR "Chikungunya virus"

OR "Crimean-Congo hemorrhagic fever"

OR "Lassa fever"

OR "Nipah virus"

OR "Rift Valley fever"

OR Hantavirus)

**Table 2. Quality appraisal and risk of bias assessment of included studies using a modified Joanna Briggs Institute (JBI) critical appraisal tool.**

| **Study (Year)** | **Virus** | **Organoid Type** | **1** | **2** | **3** | **4** | **5** | **6** | **7** | **8** | **9** | **10** | **Total /10** | **Quality Rating** | **Risk of Bias** |
| --- | --- | --- | --- | --- | --- | --- | --- | --- | --- | --- | --- | --- | --- | --- | --- |
| Dang et al. (2016) | ZIKV | Cerebral | 1 | 1 | 1 | 1 | 1 | 1 | 1 | 1 | 0.5 | 1 | 9.5 | High | Low |
| Hui et al. (2018) | Influenza A subtypes | Airway | 1 | 1 | 1 | 1 | 1 | 1 | 1 | 1 | 1 | 1 | 10 | High | Low |
| Muffat et al. (2018) | ZIKV, DENV | Neural | 1 | 1 | 1 | 1 | 1 | 1 | 1 | 0.5 | 0.5 | 1 | 9 | High | Low |
| Zhang et al. (2018) | JEV | Cortical | 1 | 1 | 1 | 1 | 1 | 1 | 1 | 1 | 1 | 1 | 10 | High | Low |
| Xu et al. (2019) | ZIKV | Brain | 1 | 1 | 1 | 1 | 1 | 1 | 1 | 1 | 0.5 | 1 | 9.5 | High | Low |
| Jacob et al. (2020) | SARS-CoV-2 | Brain (Choroid plexus) | 1 | 1 | 1 | 1 | 1 | 1 | 1 | 1 | 1 | 1 | 10 | High | Low |
| Yang et al. (2020) | SARS-CoV-2 | Liver, Cholangiocyte | 1 | 1 | 1 | 1 | 1 | 1 | 1 | 1 | 1 | 1 | 10 | High | Low |
| Han et al. (2021) | SARS-CoV-2 | Lung, Colonic | 1 | 1 | 1 | 1 | 1 | 1 | 1 | 1 | 1 | 1 | 10 | High | Low |
| Pei et al. (2021) | SARS-CoV-2 | Airway, Alveolar | 1 | 1 | 1 | 1 | 1 | 1 | 1 | 1 | 1 | 1 | 10 | High | Low |
| Tiwari et al. (2021) | SARS-CoV-2 | Lung, Cerebral | 1 | 1 | 1 | 1 | 1 | 1 | 1 | 1 | 1 | 0.5 | 9.5 | High | Low |
| Krenn et al. (2021) | ZIKV, HSV-1 | Brain | 1 | 1 | 1 | 1 | 1 | 1 | 1 | 1 | 1 | 1 | 10 | High | Low |
| Schultz et al. (2021) | CHIKV | Cerebral | 1 | 1 | 1 | 1 | 1 | 1 | 1 | 1 | 0.5 | 1 | 9.5 | High | Low |
| Tsang et al. (2021) | Enteroviruses | Intestinal | 1 | 1 | 1 | 1 | 1 | 1 | 1 | 1 | 1 | 1 | 10 | High | Low |
| Zhao et al. (2021) | SARS-CoV-2, Enteroviruses | Intestinal | 1 | 1 | 1 | 1 | 1 | 1 | 1 | 1 | 1 | 1 | 10 | High | Low |
| Salgueiro et al. (2022) | Influenza A | Lung, Tumor lung | 1 | 1 | 1 | 1 | 1 | 1 | 1 | 1 | 1 | 1 | 10 | High | Low |
| Natarajan et al. (2022) | HCV | Liver–T cell coculture | 1 | 1 | 1 | 1 | 1 | 1 | 1 | 1 | 1 | 1 | 10 | High | Low |
| Flores et al. (2025) | EBOV, MARV | Intestinal, Colonic | 1 | 1 | 1 | 1 | 1 | 1 | 1 | 1 | 1 | 1 | 10 | High | Low |
| Xu et al. (2025) | SARS-CoV-2 | Macrophage-augmented intestinal (MaugOs) | 1 | 1 | 1 | 1 | 1 | 1 | 1 | 1 | 1 | 1 | 10 | High | Low |
| Nakata et al. (2025) | MPXV | Lung | 1 | 1 | 1 | 1 | 1 | 0.5 | 1 | 1 | 0.5 | 1 | 9 | High | Low |
| Rothan et al. (2025) | Influenza H5N1 | Airway | 1 | 1 | 1 | 1 | 1 | 1 | 1 | 1 | 1 | 1 | 10 | High | Low |
| Chiok et al. (2025) | SARS-CoV-2, MERS-CoV | Lung | 1 | 1 | 1 | 1 | 1 | 1 | 1 | 1 | 1 | 1 | 10 | High | Low |
| Schultz-Pernice et al. (2025) | MPXV | Neural | 1 | 1 | 1 | 1 | 1 | 1 | 1 | 1 | 1 | 1 | 10 | High | Low |
| Choo et al. (2026) | ZIKV | Cerebral | 1 | 1 | 1 | 1 | 1 | 1 | 1 | 1 | 1 | 1 | 10 | High | Low |

Note: **Domains assessed (modified for organoid infection models):**

1. Clearly defined study objectives and hypothesis
2. Detailed and reproducible organoid derivation method
3. Clear viral infection protocol (MOI, strain, time points)
4. Inclusion of appropriate control or mock-infected organoids
5. Replicates and sample size described
6. Quantitative assessment of immune response (e.g., cytokines, ISGs)
7. Use of validated or standardized assays (RT-qPCR, ELISA, RNA-seq)
8. Statistical analysis appropriately described
9. Reproducibility or validation across replicates or independent experiments
10. Transparency in data presentation (raw data, figures, or supplemental details)

Scoring:
**Yes = 1**, **No = 0**, **Unclear = 0.5**
**Total Quality Rating:**

- **High (8–10)** = low risk of bias
- **Moderate (5–7.5)** = moderate risk of bias
- **Low (<5)** = high risk of bias

**Table 3: Summary of Certainty of Evidence for Organoid-Based Viral Infection Studies**

| **Virus / Pathogen** | **Number of Studies** | **Organoid Systems Studied** | **Consistency of Findings** | **Methodological Quality** | **Directness to Human Immunity** | **Precision of Results** | **Overall Certainty of Evidence** |
| --- | --- | --- | --- | --- | --- | --- | --- |
| **SARS-CoV-2** | 8 | Lung, Colonic, Hepatic, Neural, Intestinal | Very high – consistent induction of interferon, NF-κB, and cytokine pathways | High | High – human PSC-derived models replicate tissue-specific viral entry and immune signaling | High | **High** |
| **MERS-CoV** | 1 | iPSC-derived Lung | Moderate – partial IFN signaling, enhanced IL-1β | High | High | Moderate | **Moderate** |
| **Mpox virus (MPXV)** | 2 | Lung, Neural | Moderate – low immune activation in lung, mild IFN-β and IL-6 induction in neural organoids | High | High | Moderate | **Moderate** |
| **Zika virus (ZIKV)** | 4 | Cerebral, Neural, Brain | High – reproducible TLR3 activation and IFN-I/ISG upregulation | High | High | Moderate (limited replicate reporting in early studies) | **High** |
| **Japanese Encephalitis Virus (JEV)** | 1 | Cortical | High – clear stage-dependent IFNβ and ISG induction | High | High | High | **High** |
| **Dengue virus (DENV)** | 1 | Neural | Moderate – consistent cytokine induction, fewer replicates | High | High | Moderate | **Moderate to High** |
| **Chikungunya virus (CHIKV)** | 1 | Cerebral (PD vs. non-PD) | Moderate – differential IL-6, IL-10, CXCL10 expression | High | High | Moderate | **Moderate** |
| **Influenza A (H1N1, H5N1, H7N9)** | 3 | Airway, Lung, Tonsil | Very high – reproducible IL-6, IFNβ, and CXCL10 upregulation | High | High | High | **High** |
| **Ebola virus (EBOV)** | 2 | Intestinal, Colonic | High – consistent IL-6 and TNF-α induction, moderate IFN response | High | High | High | **High** |
| **Marburg virus (MARV)** | 2 | Intestinal, Colonic | Very high – reproducible and stronger IFNβ, CXCL10 induction than EBOV | High | High | High | **High** |
| **Enteroviruses (EV-A71, CVA16)** | 2 | Intestinal | High – consistent IFNλ and cytokine activation; strong reproducibility | High | High | High | **High** |
|  |  |  |  |  |  |  |  |
| **Hepatitis C virus (HCV)** | 1 | Liver–T cell Co-culture | High – robust IFNγ secretion and cytotoxic T-cell activation | High | High | High | **High** |
